# Supplementary material
Source: PubMed Central journal article supplement (PMC9392493)
Supplement: NIHMS1660025-supplement-1.pdf [file NIHMS1660025-supplement-1.pdf]

## *Supplementary Figures*

# **Radiation Promotes Inflammation-Driven Targeting of Chemoradiotherapy Enhancing Nanoparticles**

Allison N. DuRoss <sup>a</sup>, Madeleine R. Landry <sup>a</sup>, Charles R. Thomas, Jr. <sup>b</sup>, Megan J. Neufeld <sup>a\*</sup>,  
Conroy Sun <sup>a,b\*</sup>

<sup>a</sup> Department of Pharmaceutical Sciences, Oregon State University, 2730 S Moody Ave, Portland, OR 97201, USA

<sup>b</sup> Department of Radiation Medicine, Oregon Health & Science University, 3181 SW Sam Jackson Park Rd, Portland, OR 97239, USA

\*Corresponding author(s)

Conroy Sun, Ph.D. & Megan Neufeld, Ph.D.  
Department of Pharmaceutical Sciences  
Oregon State University  
2730 SW Moody Ave  
Portland, OR 97201-5041, USA  
Phone: 503-346-4699  
Fax: 503-494-8797  
Email: [sunc@ohsu.edu](mailto:sunc@ohsu.edu), [neufeldm@oregonstate.edu](mailto:neufeldm@oregonstate.edu)  
Twitter: @CSunLab

**A**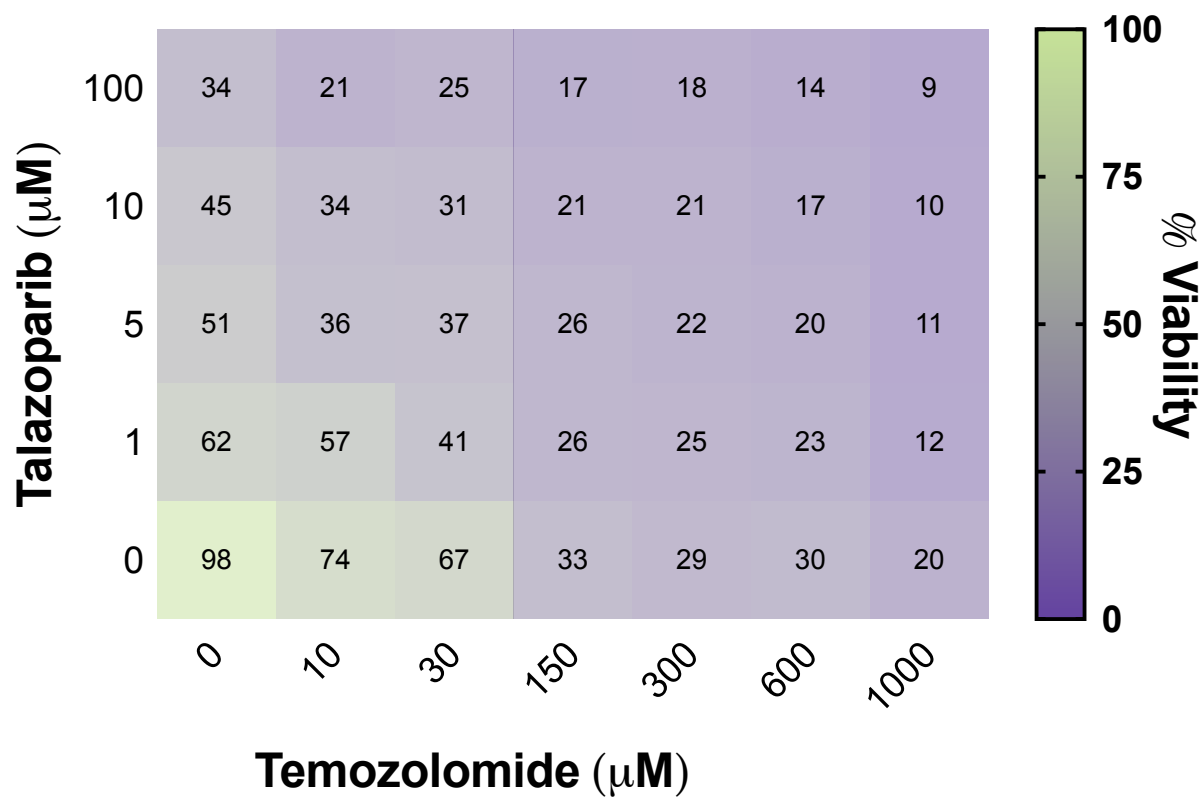**B**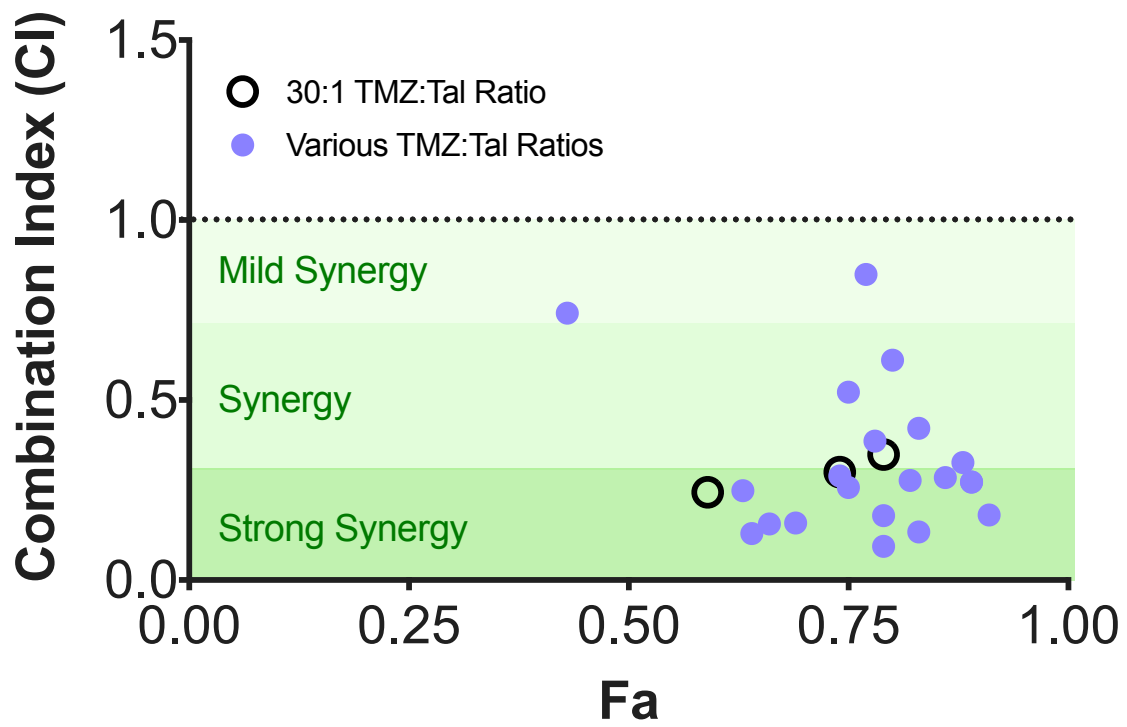

**Supplemental Figure 1. A.** *In vitro* viability of various TMZ:Tal ratios across a range of combinations. **B.** Combination index values for various TMZ:Tal ratios (purple circles) and several 30:1 TMZ:Tal ratios (black outline circles) where strong synergy is represented by a CI < 0.3, synergy is represented by 0.3 < CI < 0.7, and mild synergy is represented by CI > 0.7.

# Tal in PBS

2000  $\mu\text{M}$

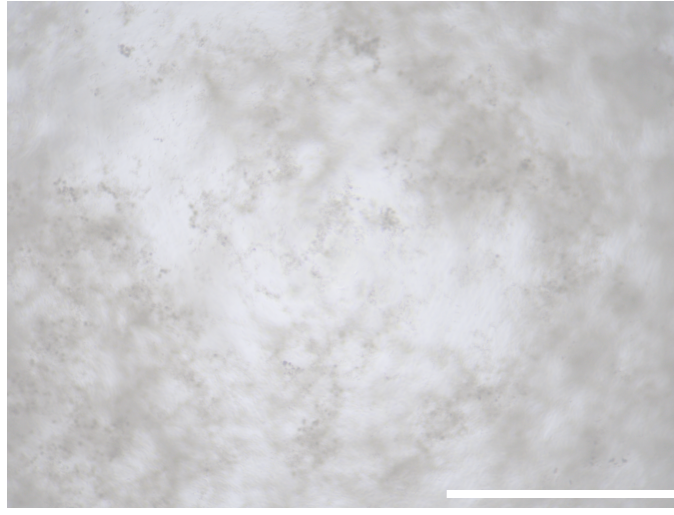

1000  $\mu\text{M}$

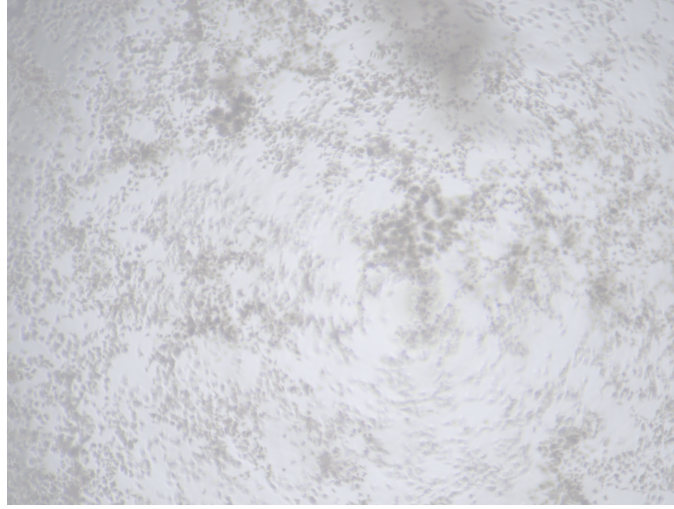

500  $\mu\text{M}$

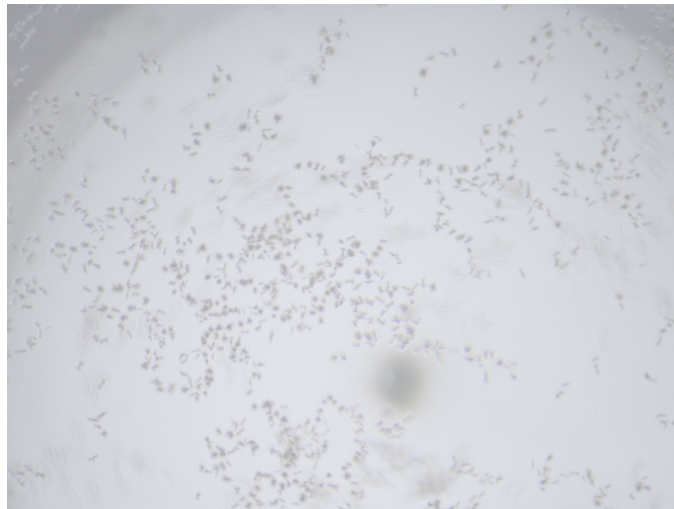

250  $\mu\text{M}$

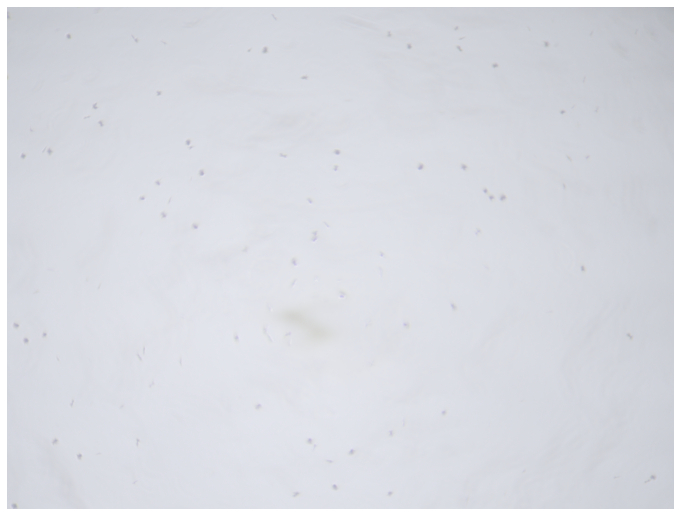

125  $\mu\text{M}$

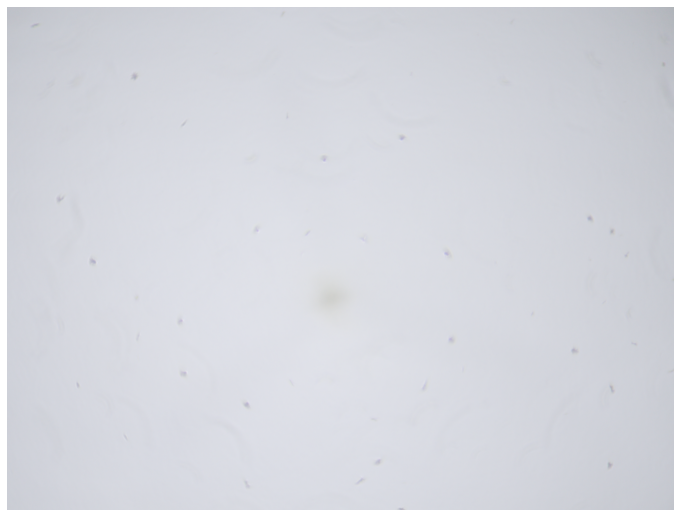

**A**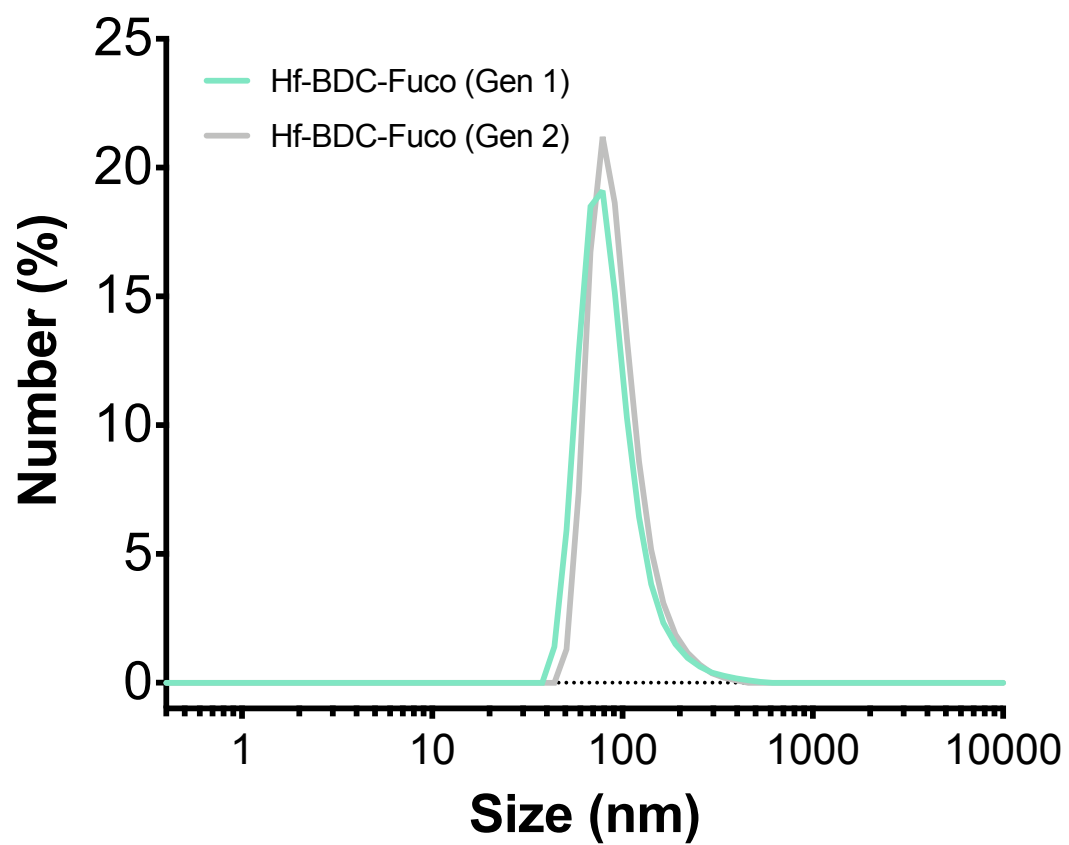**B**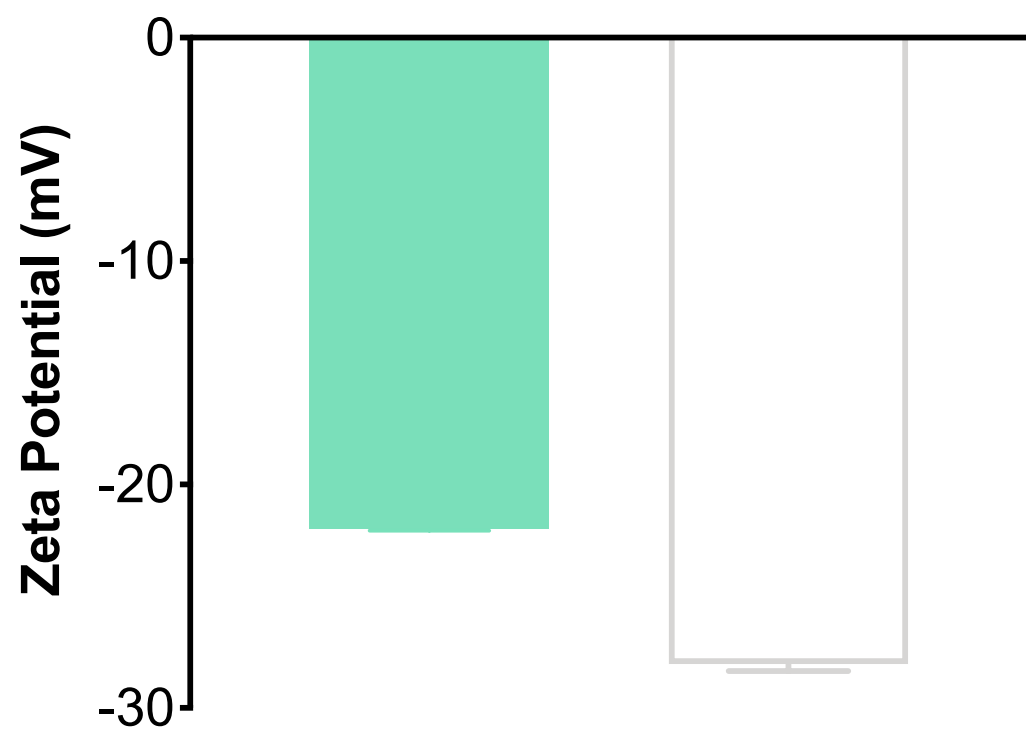**C**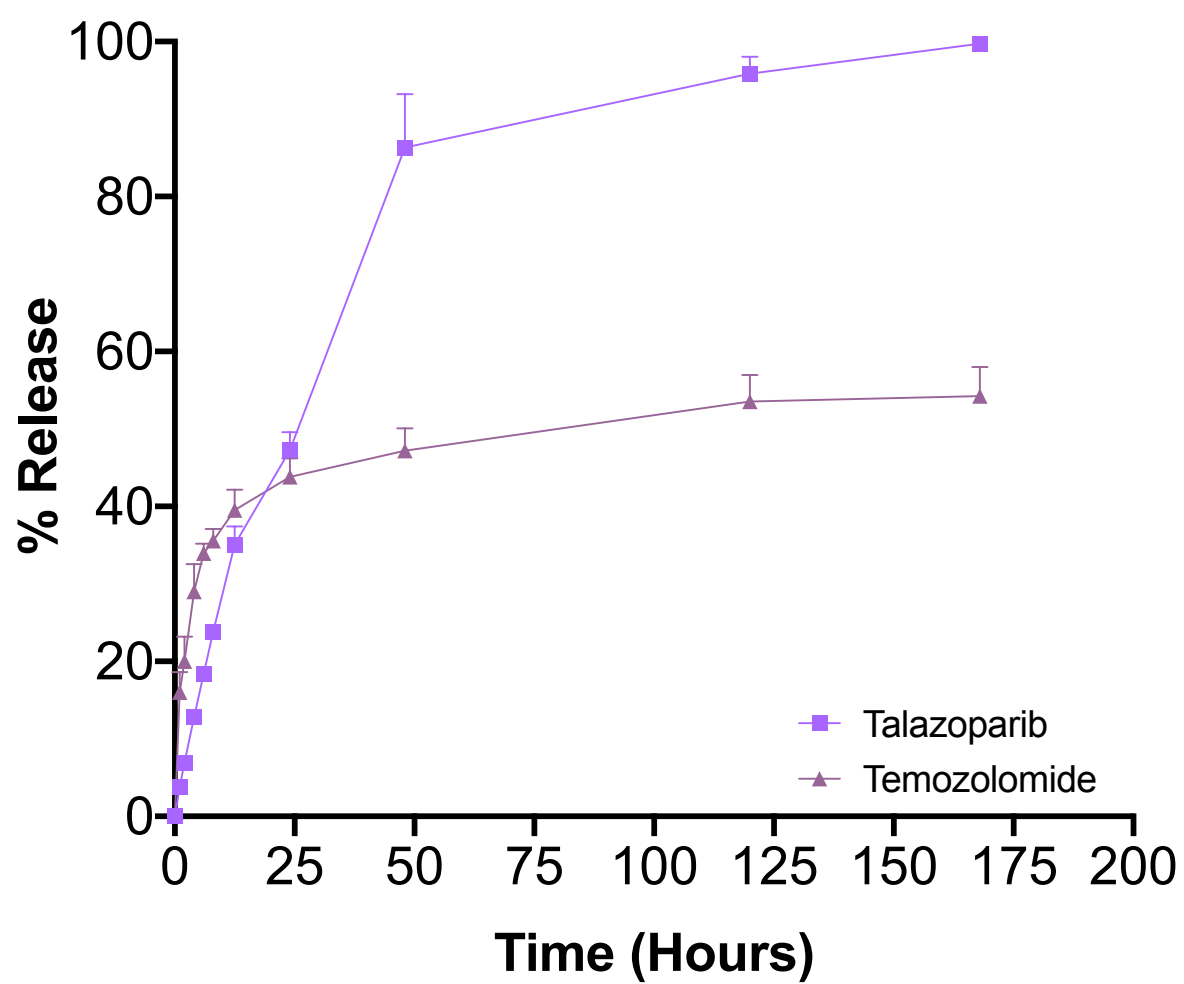

**Supplemental Figure 3. A.** Size by number and **B.**  $\zeta$  potential as measured by DLS comparing the two slightly different coating methods. **C.** Release profile of TMZ and Tal from gen 1 TT@Hf-BDC-Fuco nMOF.

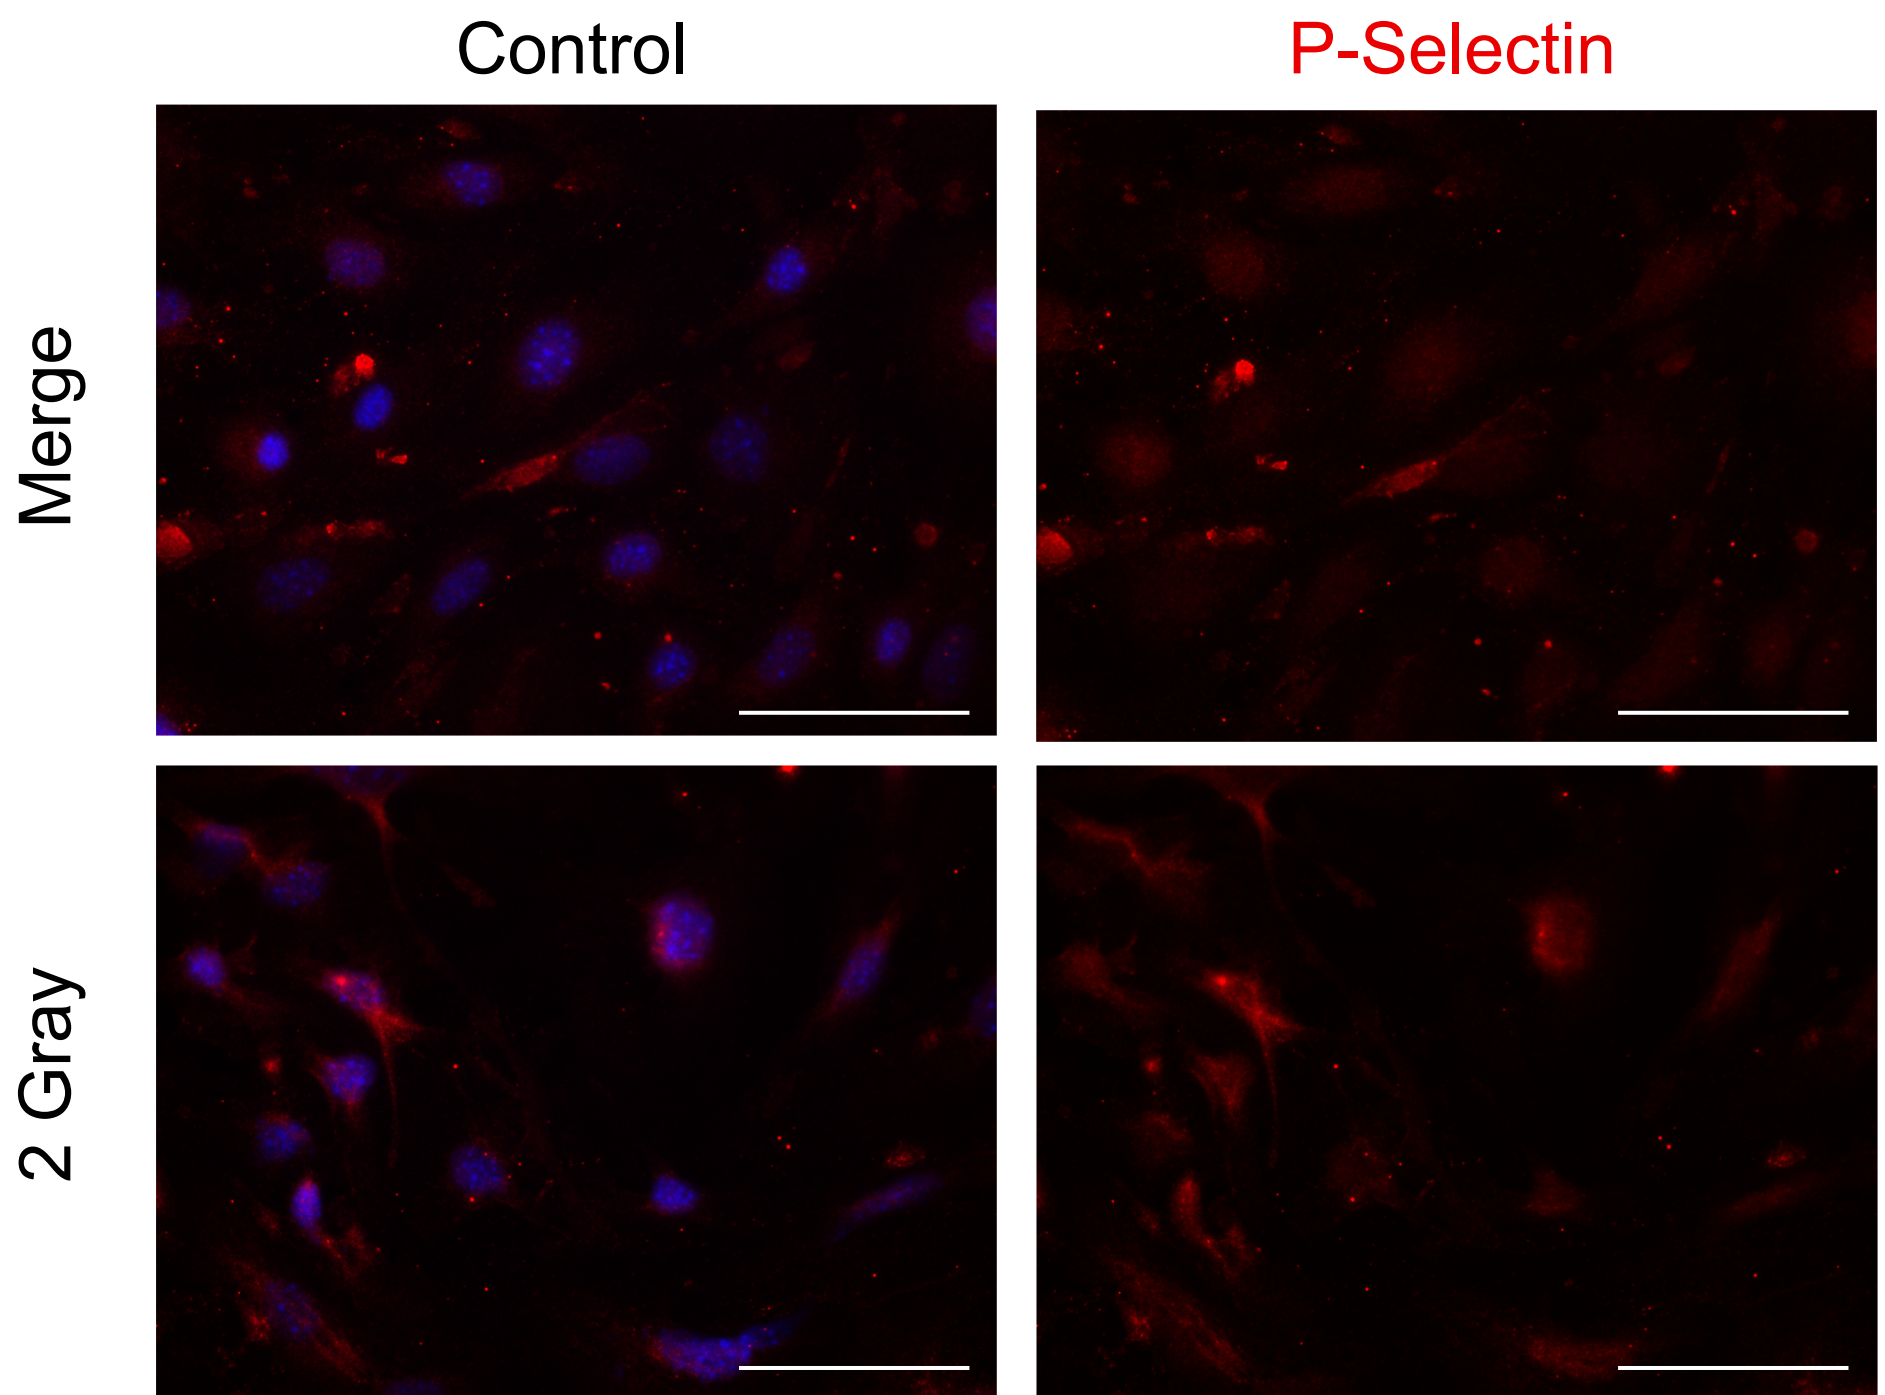

**Supplemental Figure 4.** Representative images of P-selectin expression in bEnd.3 endothelial cells with and without a radiation dose of 2 gray. Scale bars represent 200  $\mu\text{m}$ .

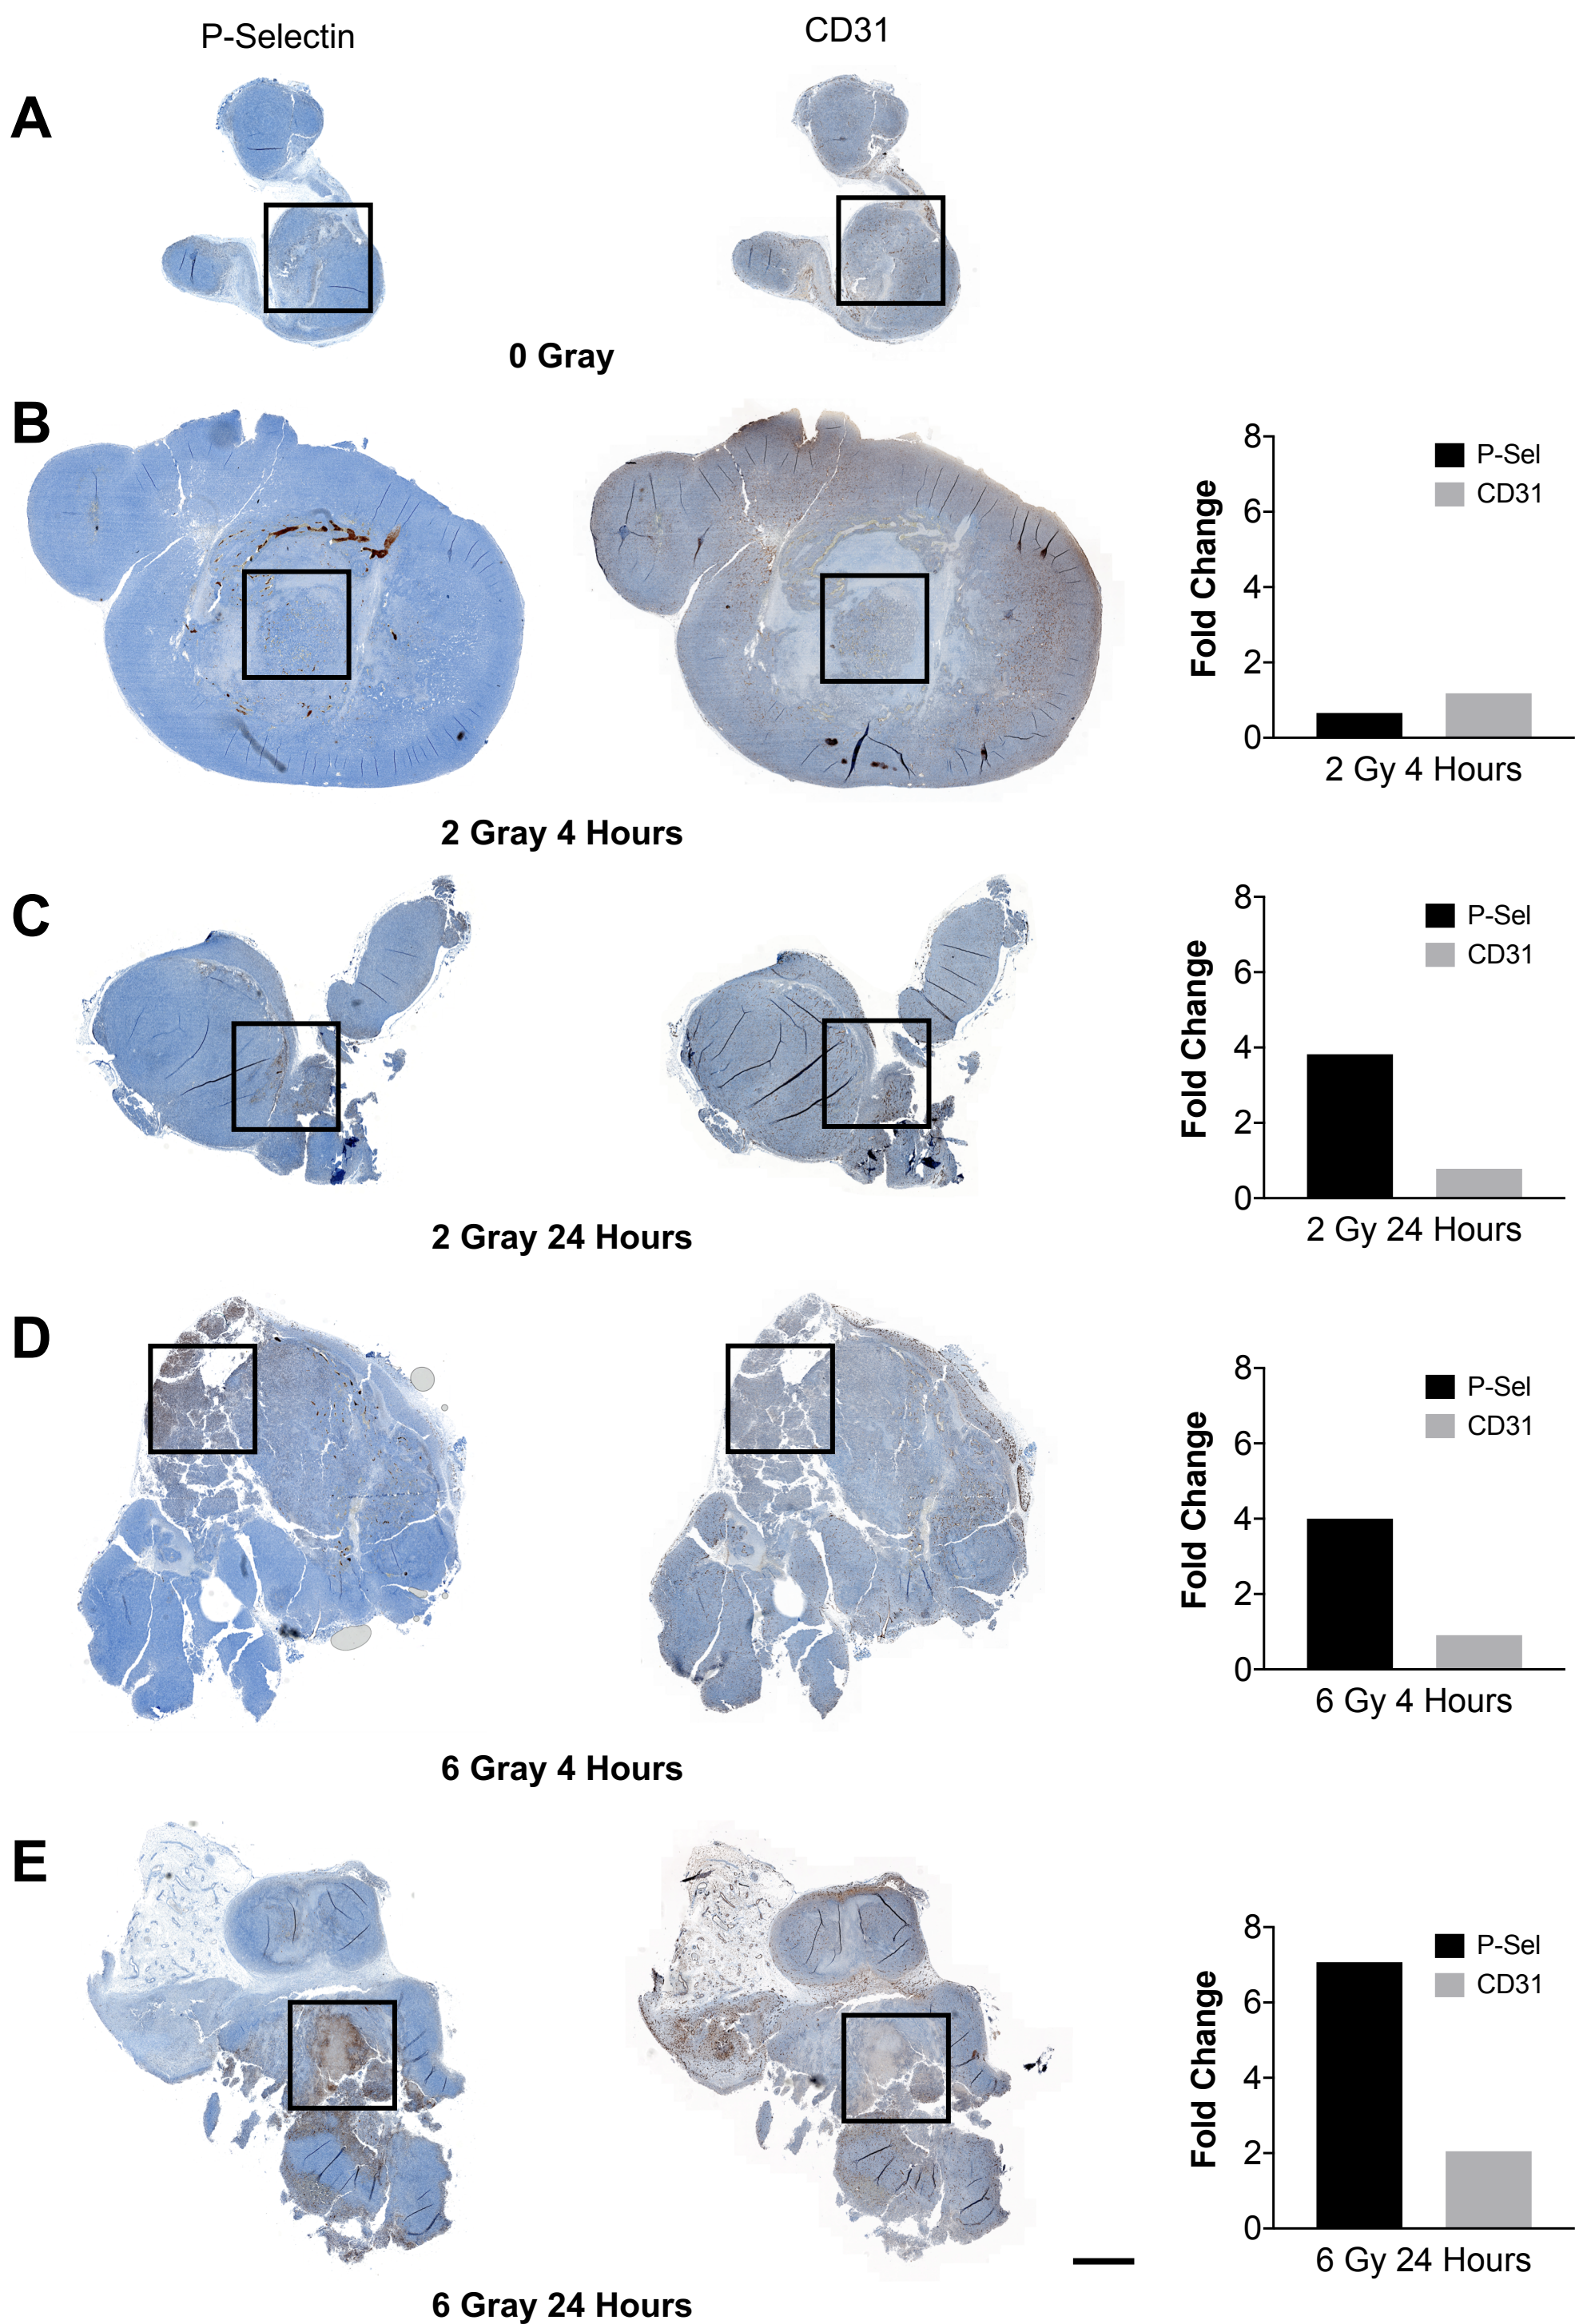

**Supplemental Figure 5.** Representative tumor tissue slice for P-selectin (left) and CD31 (middle) expression in tumors after various IR treatments. Fold change in expression of P-selectin or CD31 over 0 Gy control (right). **A.** Control tissue no IR. **B.** Tissue harvested 4 hours after a dose of 2 Gy. **C.** Tissue harvested 24 hours after a dose of 2 Gy. **D.** Tissue harvested 4 hours after a dose of 6 Gy. **E.** Tissue harvested 24 hours after a dose of 6 Gy. Boxes represent zoomed images from figure 3C. Scale bar represents 2000  $\mu$ m for all tissues.

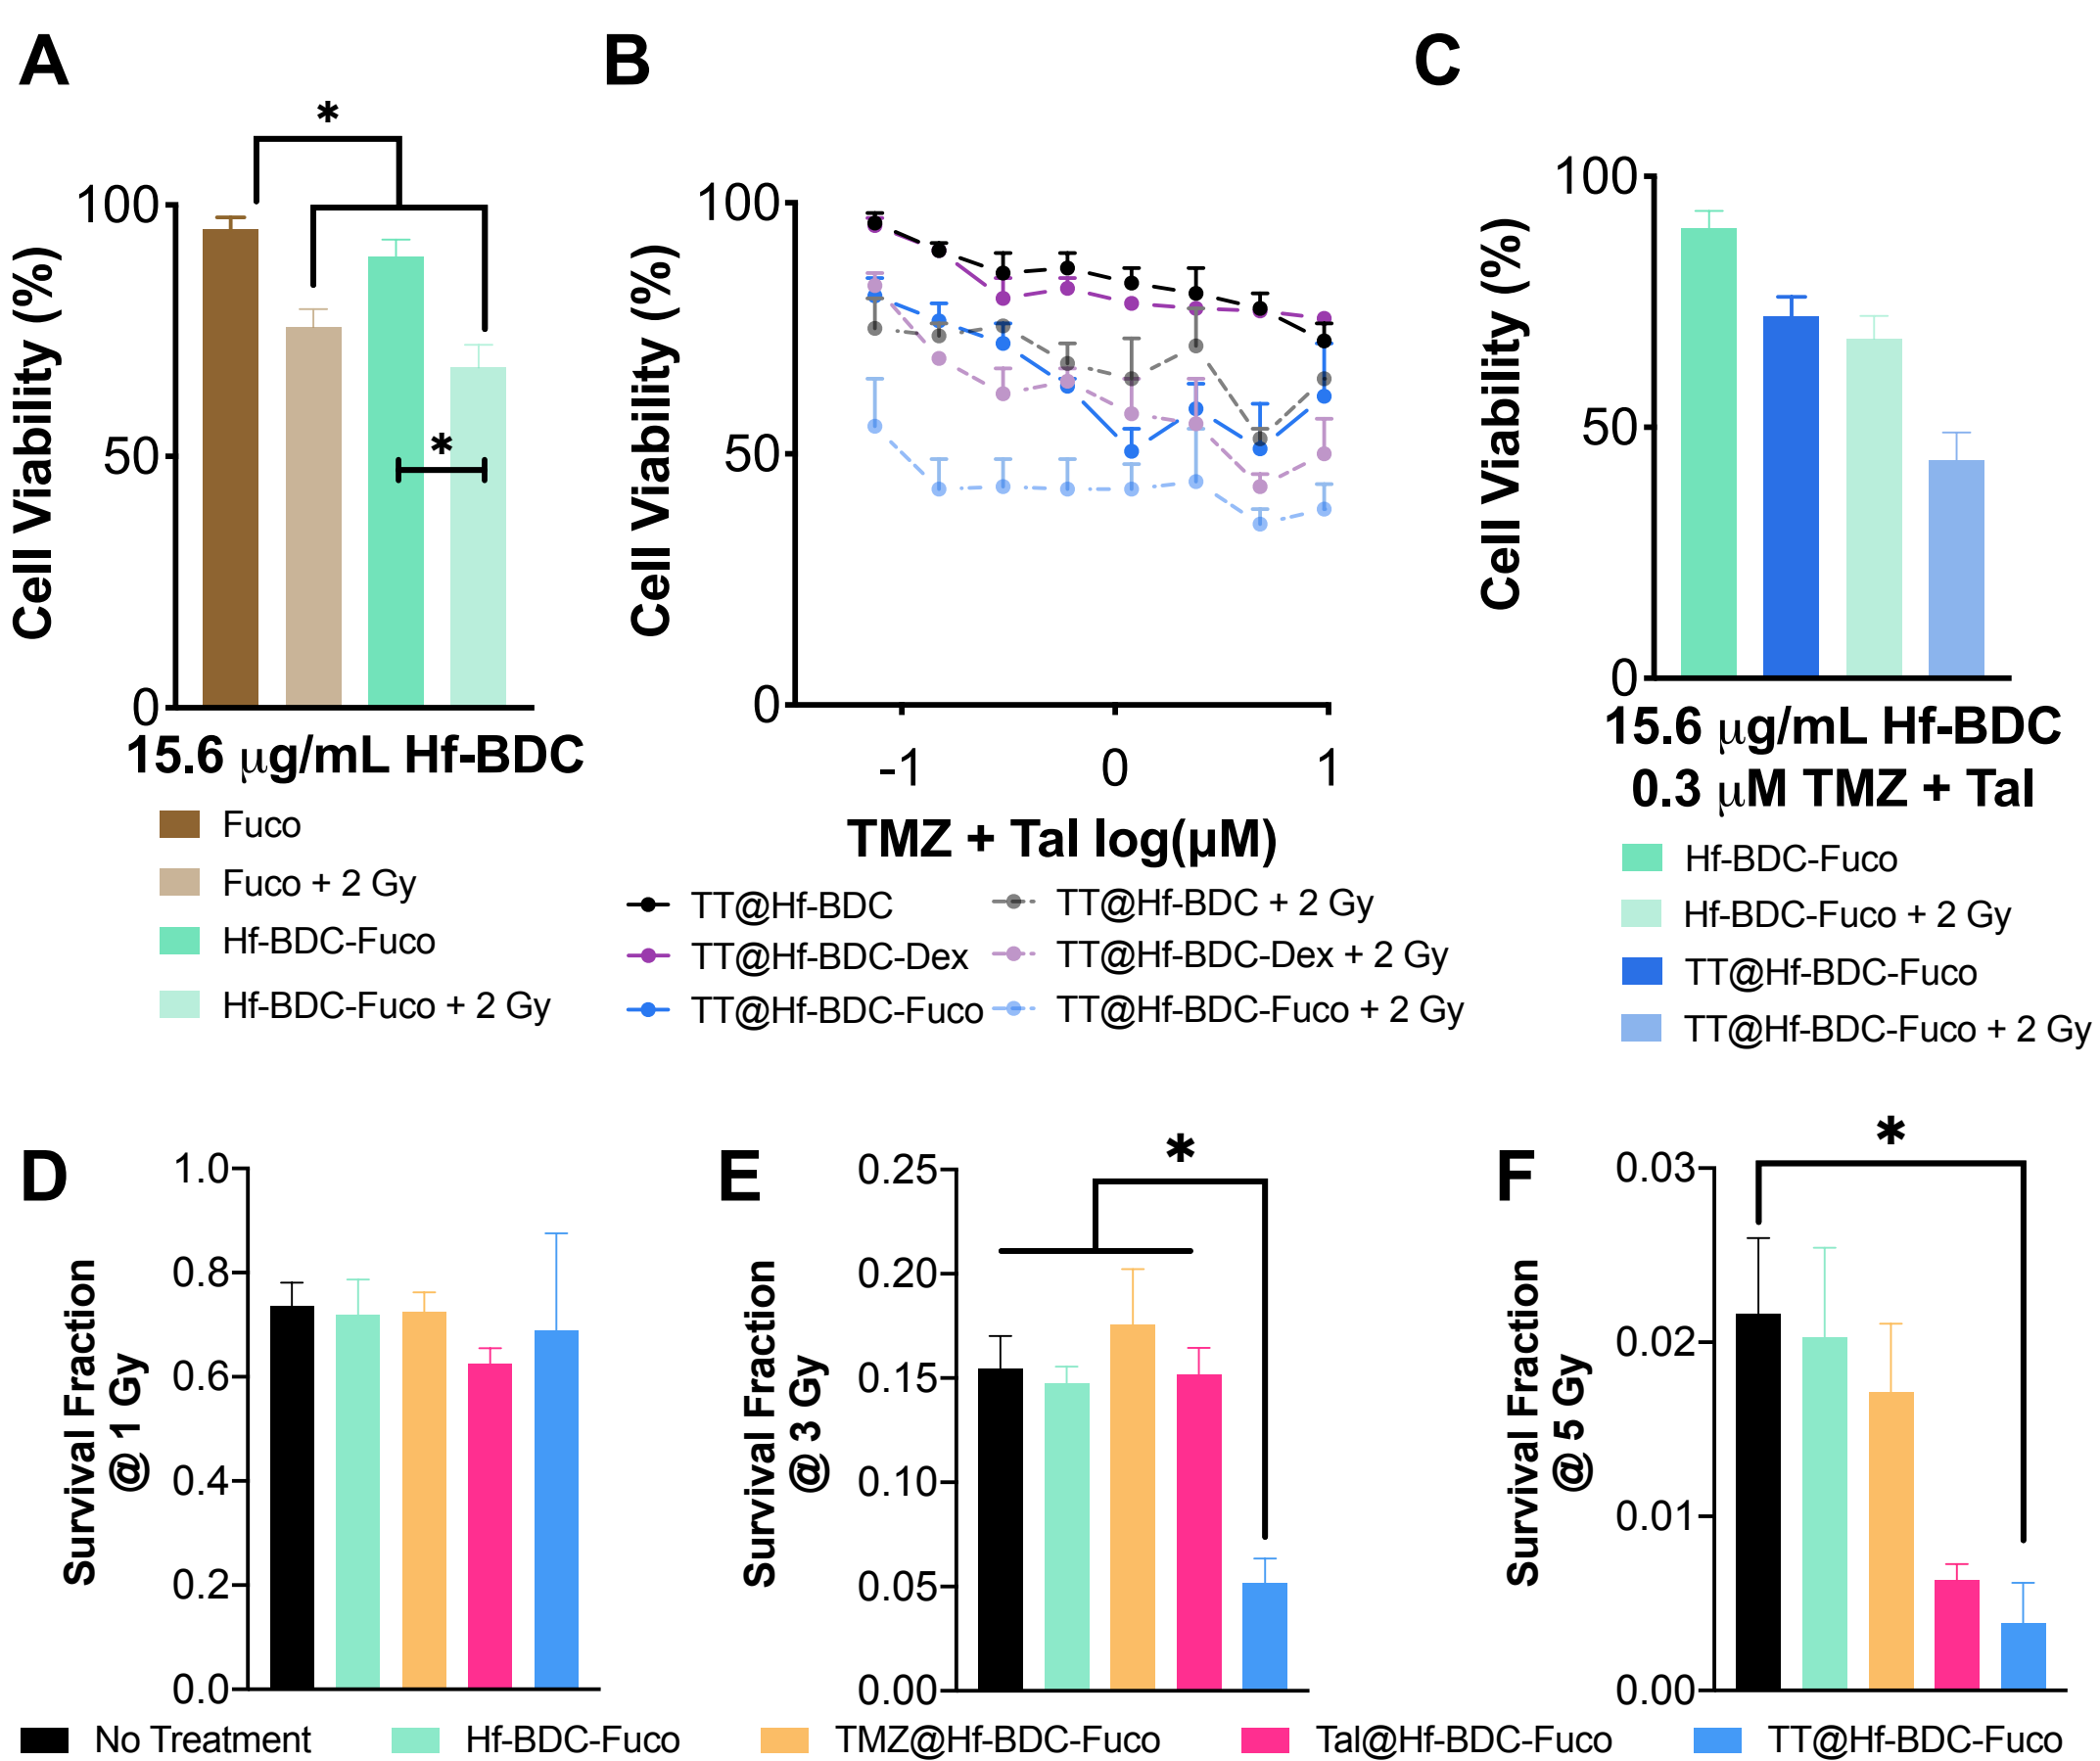

**Supplemental Figure 6.** **A.** Comparison of +/- IR fuco vs Hf-BDC-fuco at concentration used for drug-loaded viability. Asterisks (\*) represent statistically significant difference ( $p < 0.05$ ) analyzed by one-way ANOVA with multiple comparisons. **B.** TT concentration that does provide any significant benefit. **C.** TT concentration that does not provide any significant benefit. **D.** Comparison of +/- IR Hf-BDC-Fuco and TT@Hf-BDC-Fuco. Clonogenic assay survival fraction values at **E.** one, **F.** three and, **G.** five gray demonstrates significantly decreased survival with TT-@Hf-BDC-Fuco at three and five gray radiation. Asterisks (\*) represent statistically significant difference ( $p < 0.05$ ) analyzed by one-way ANOVA with multiple comparisons.

**A**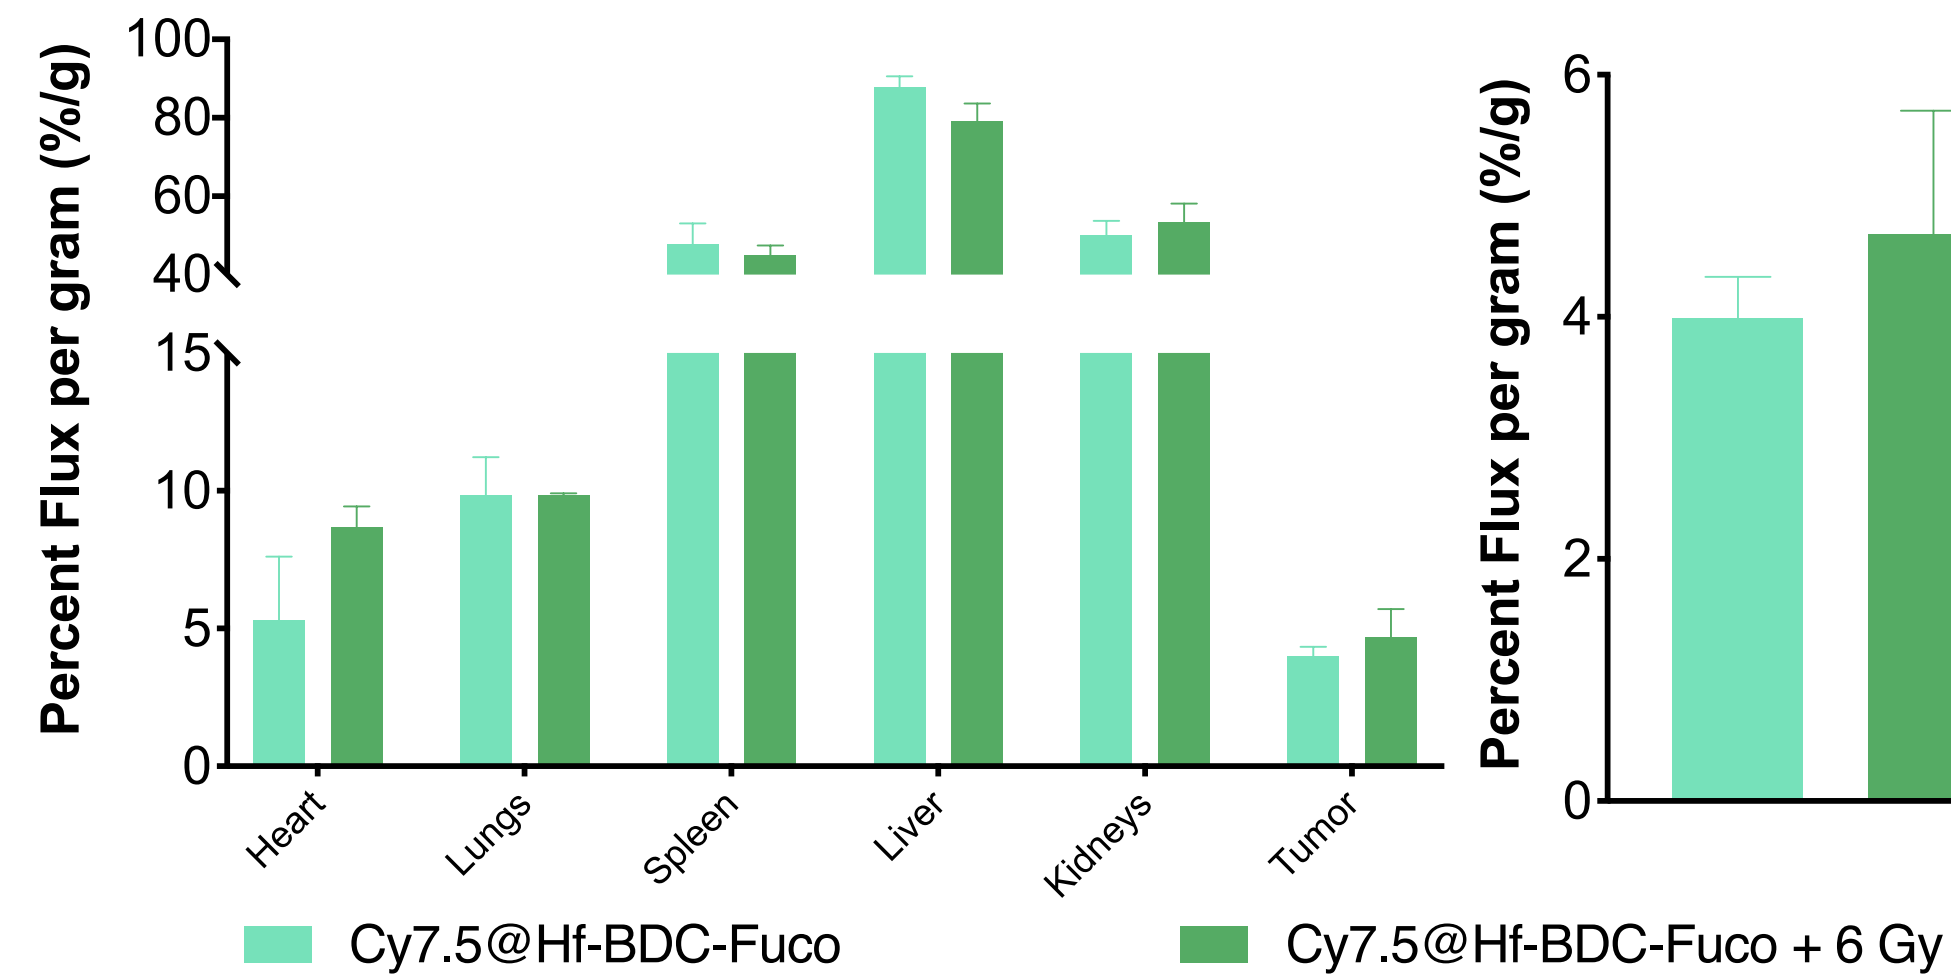**B**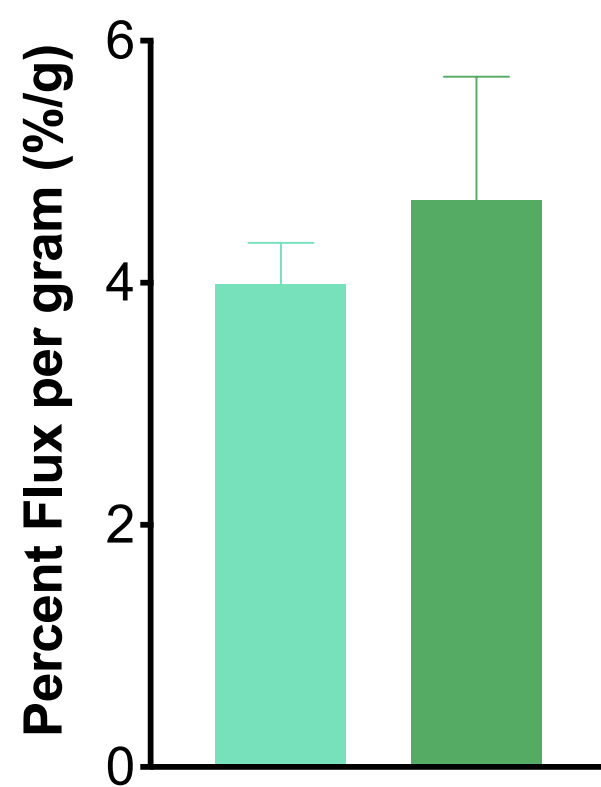

**Supplementary Figure 7. A.** Whole-organ biodistribution as quantified by IVIS imaging for mice treated with (6 gy) or without radiation and administered P-selectin targeting Hf-BDC-Fuco nMOFs. **B.** Tumor-only biodistribution.



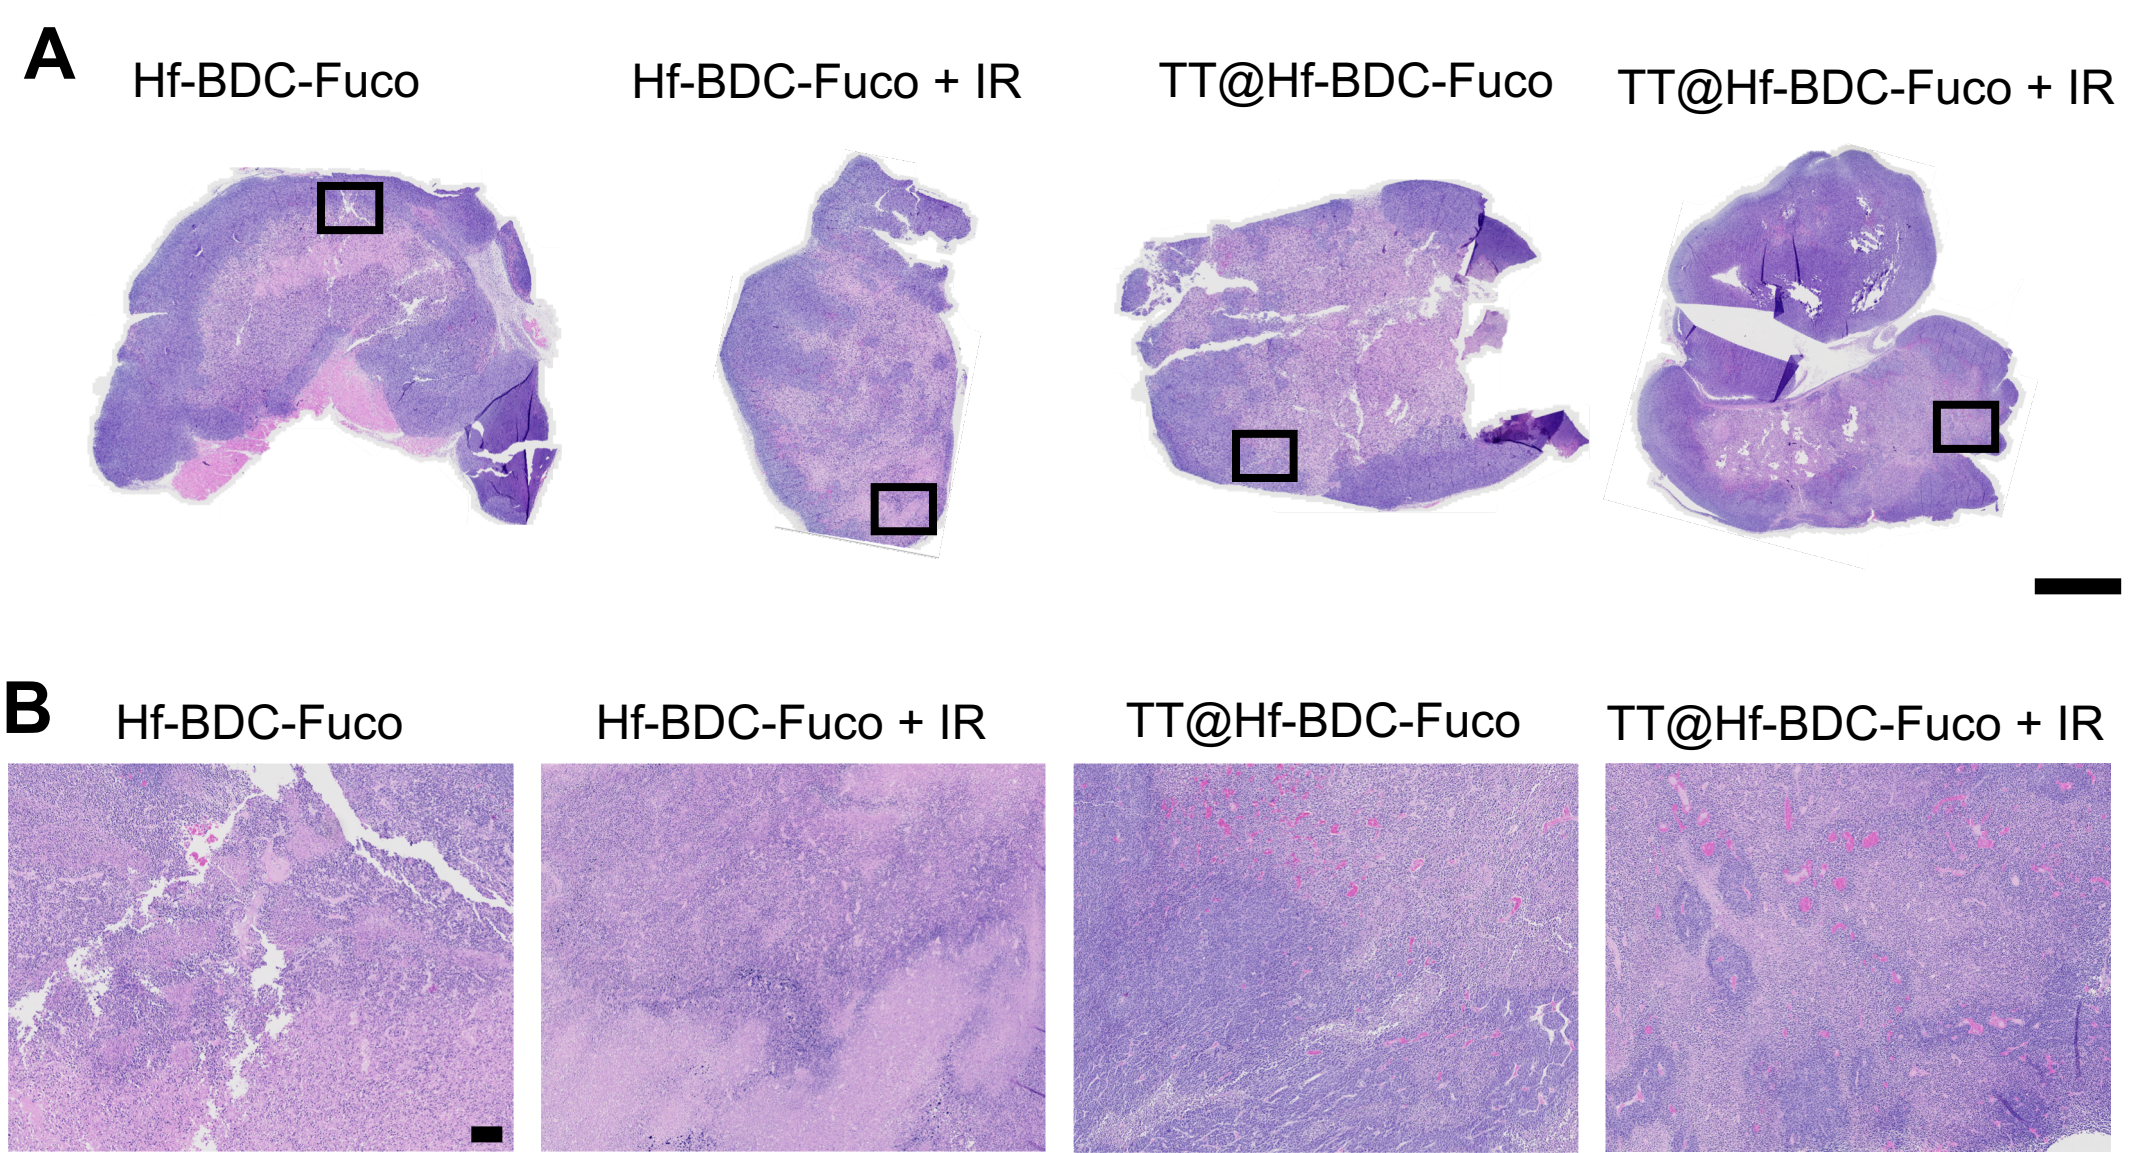

**Supplementary Figure 8.** H&E stain of **A.** Whole-tumor and **B.** zoomed inset harvested on day 14. Scale bar represents 5000 (A) or 200 (B)  $\mu\text{m}$ .

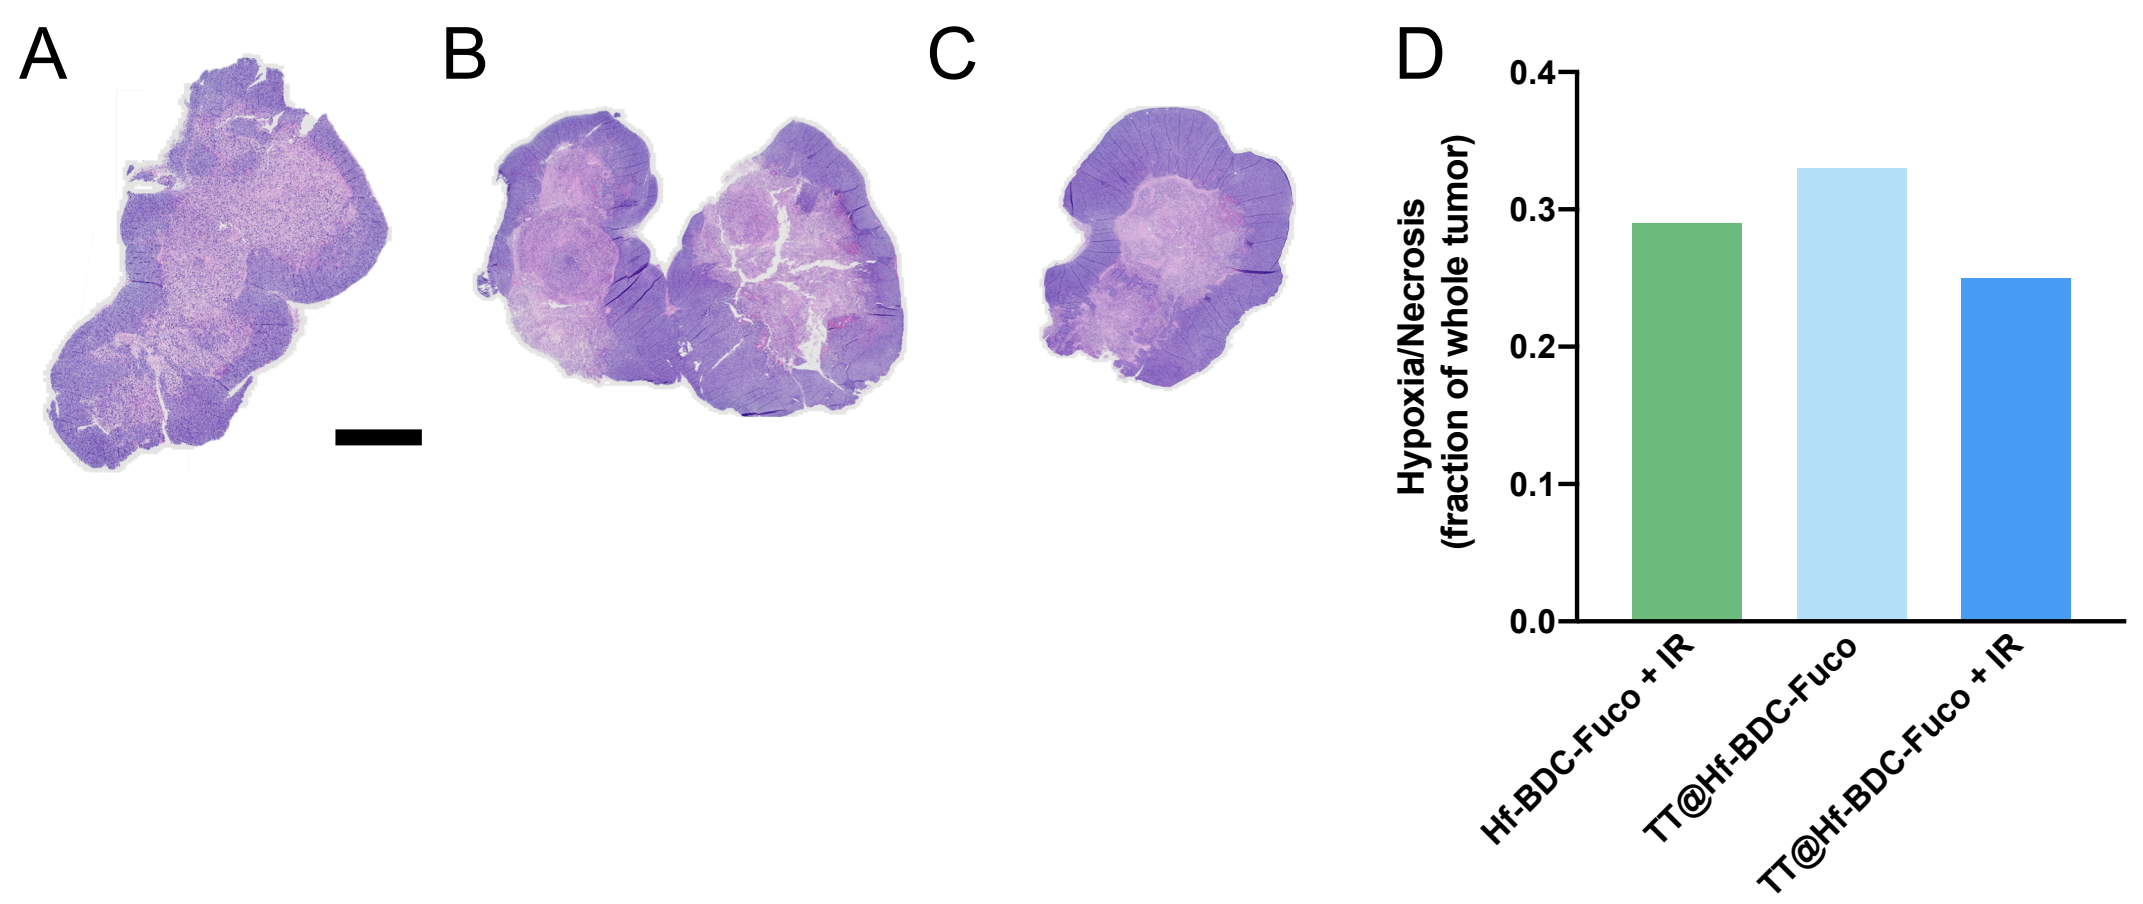

**Supplemental Figure 9.** H&E stain of **A.** Hf-BDC-Fuco +IR, **B.** TT@Hf-BDC-Fuco, and **C.** TT@Hf-BDC-Fuco + IR tumors harvested on day 21. Scale bars represent 5000  $\mu\text{m}$ . **D.** Quantification of hypoxic/necrotic regions as a fraction of whole tumor slice from figures in A-C

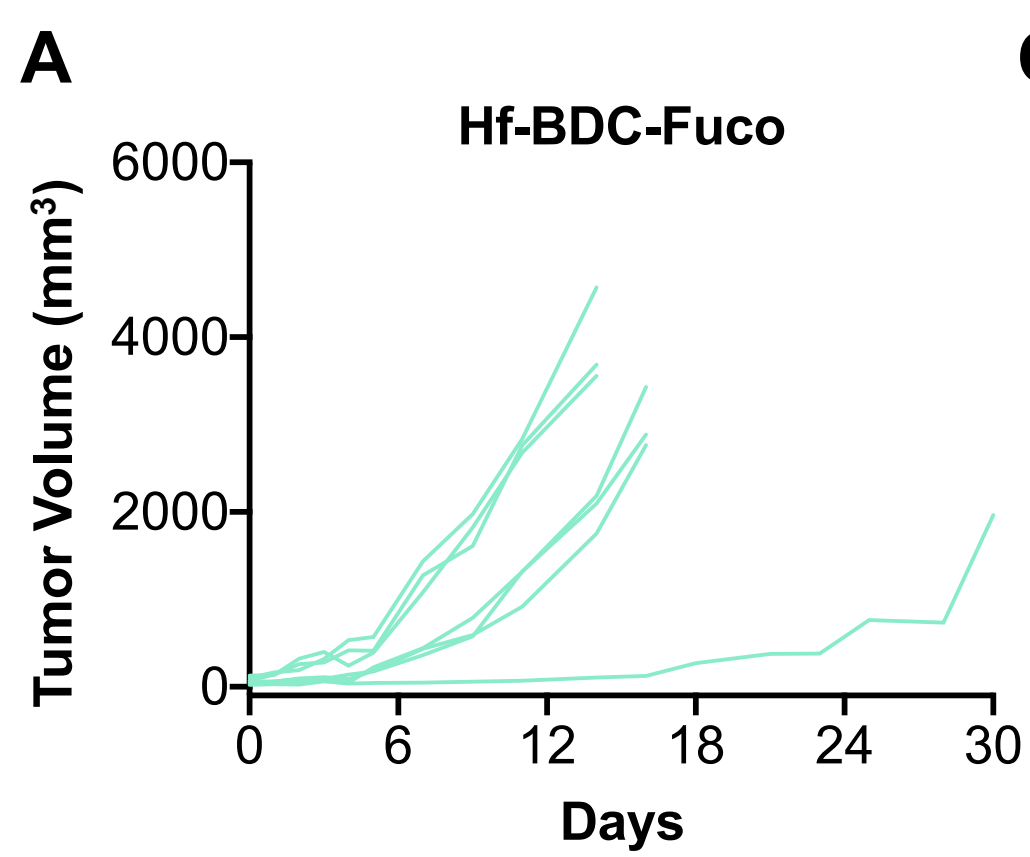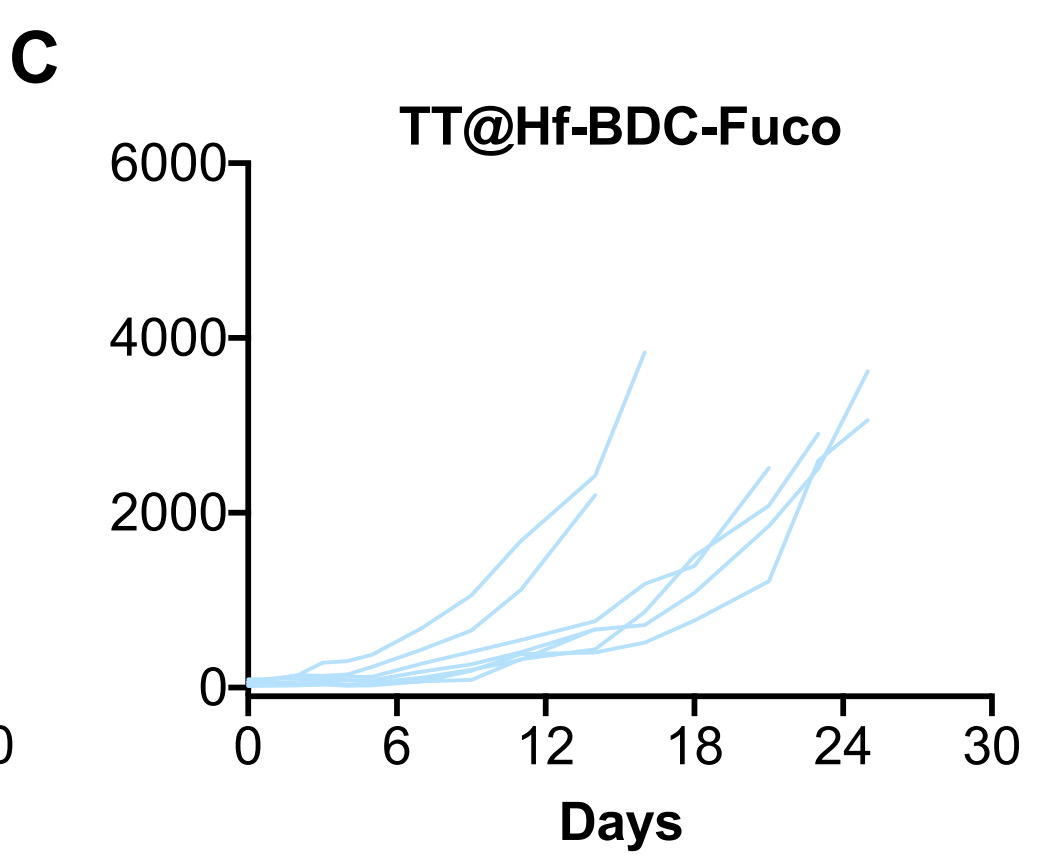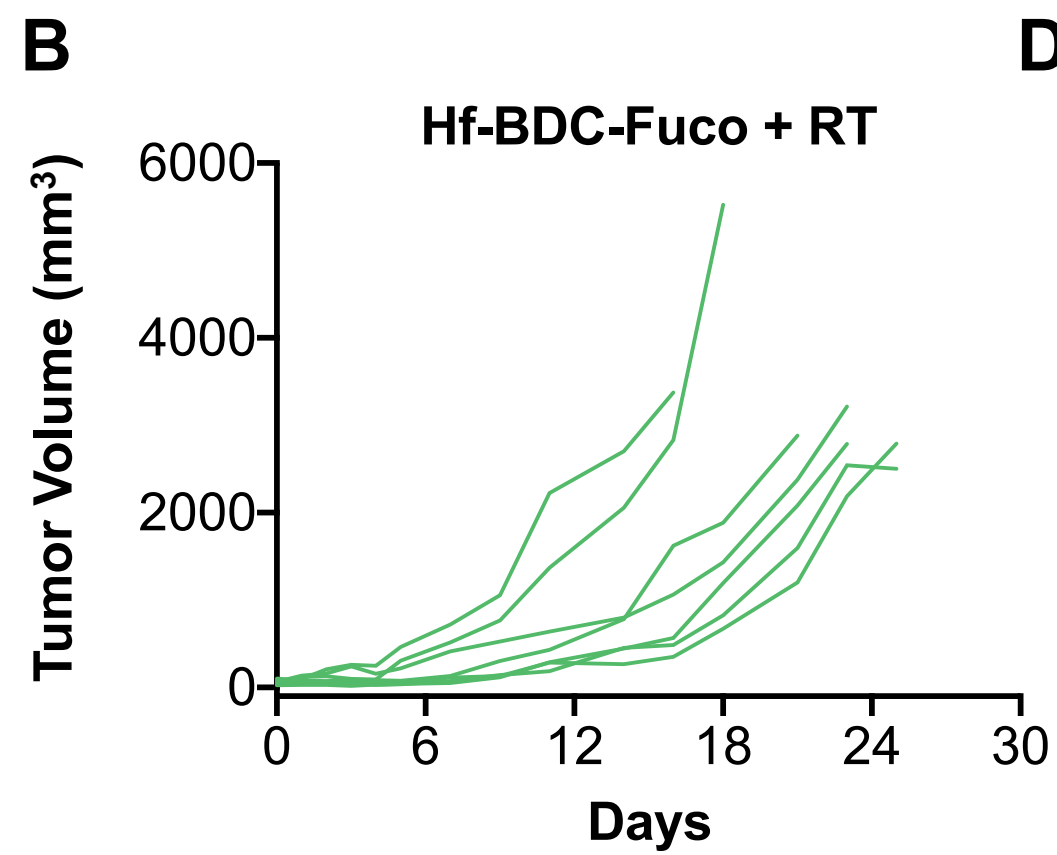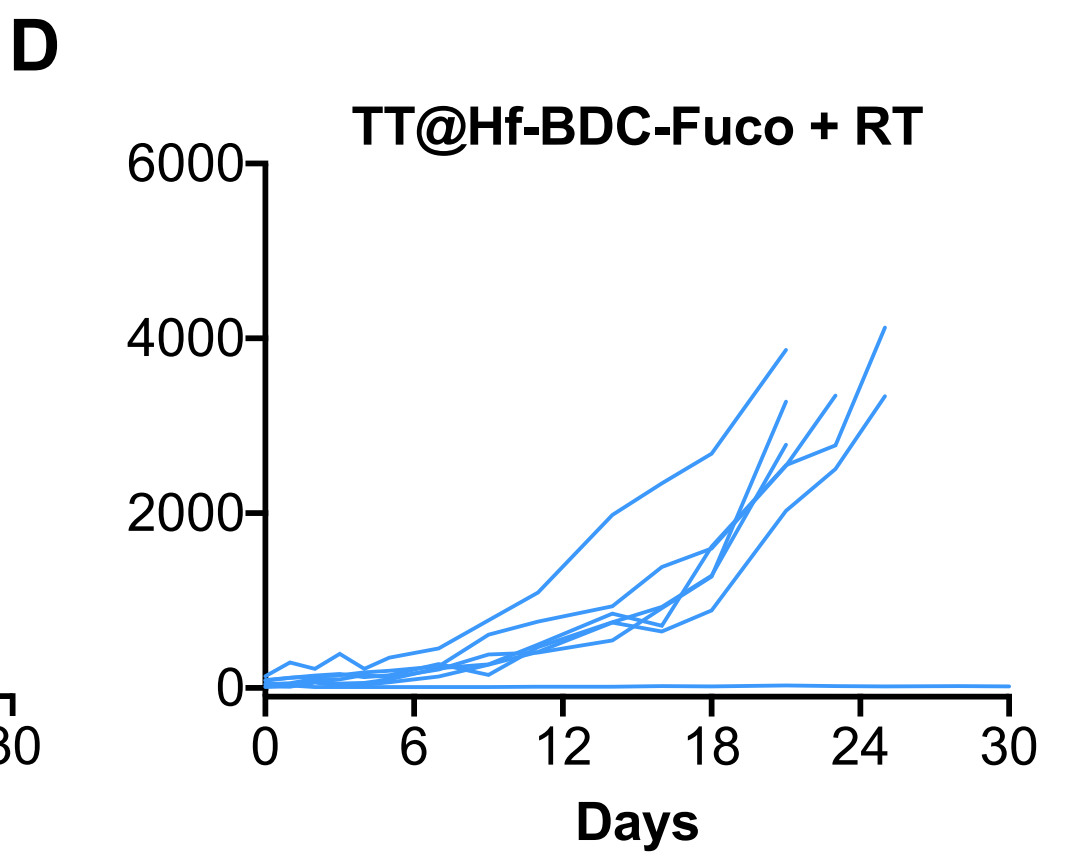

**Supplemental Figure 10.** Individual tumor curves for each treatment group for mice from multimodality treatment study, used to develop curves in figure 7. **A.** Mice treated with Hf-BDC-Fuco alone. **B.** Mice treated with TT@Hf-BDC-Fuco alone. **C.** Mice treated with Hf-BDC-Fuco and 2 fractions of 2 gray. **D.** Mice treated with TT@Hf-BDC-Fuco and 2 fractions of 2 gray.

**A**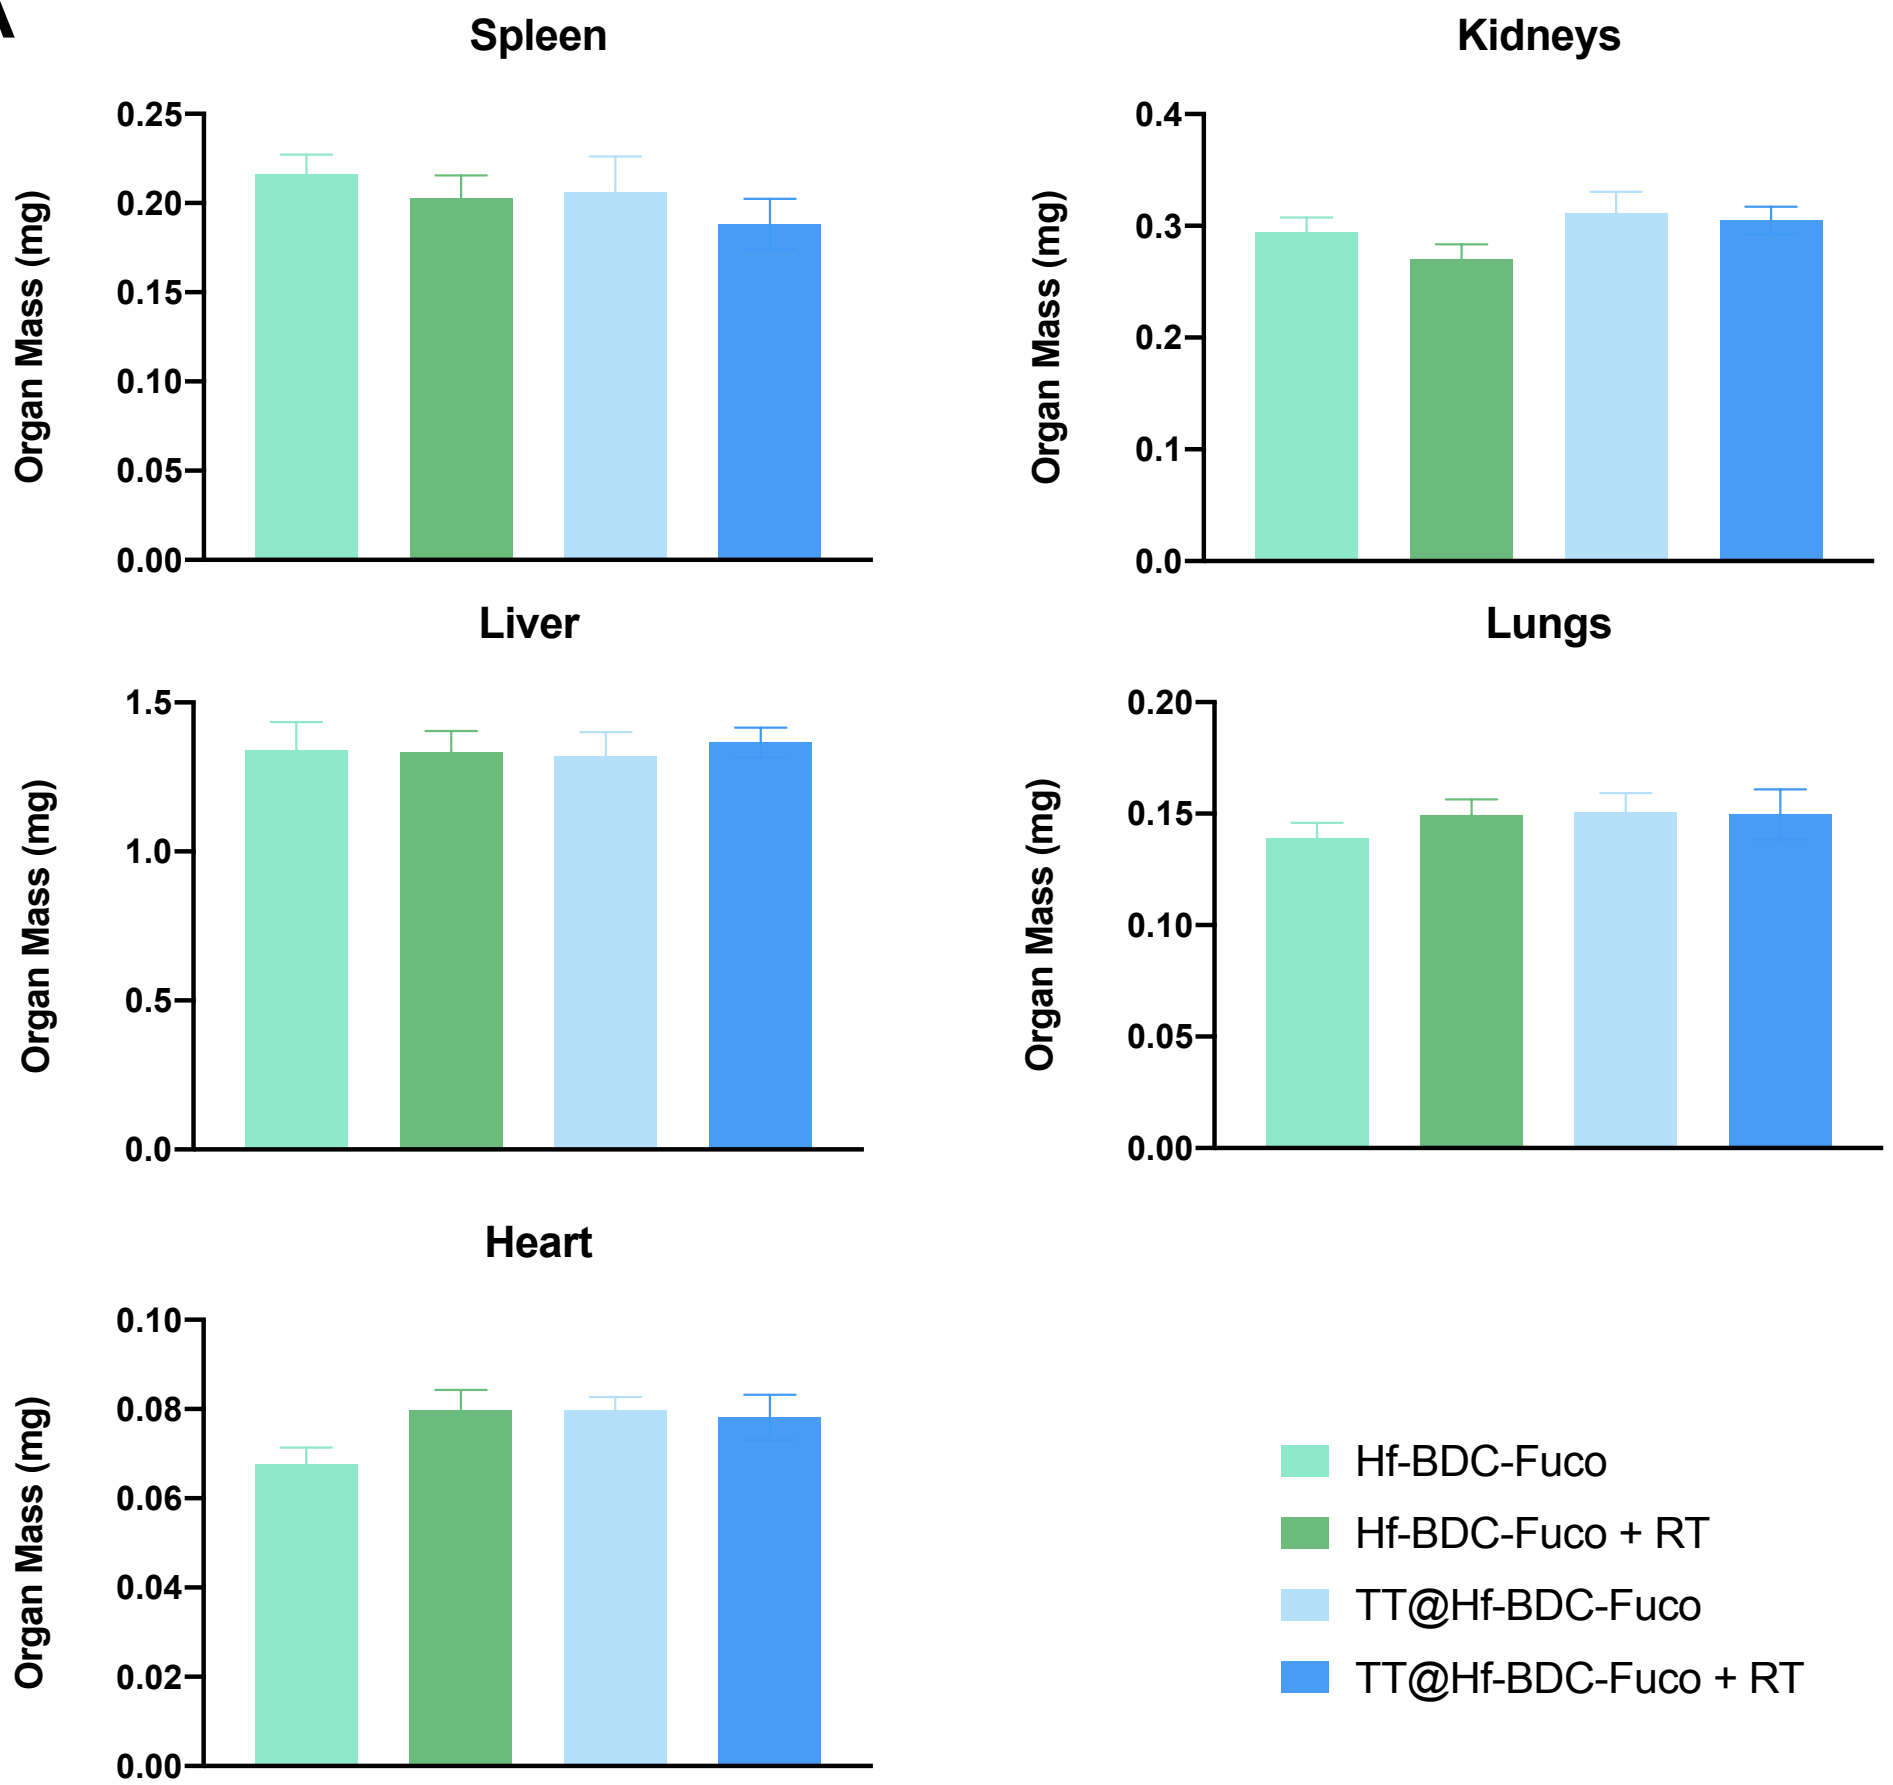**B**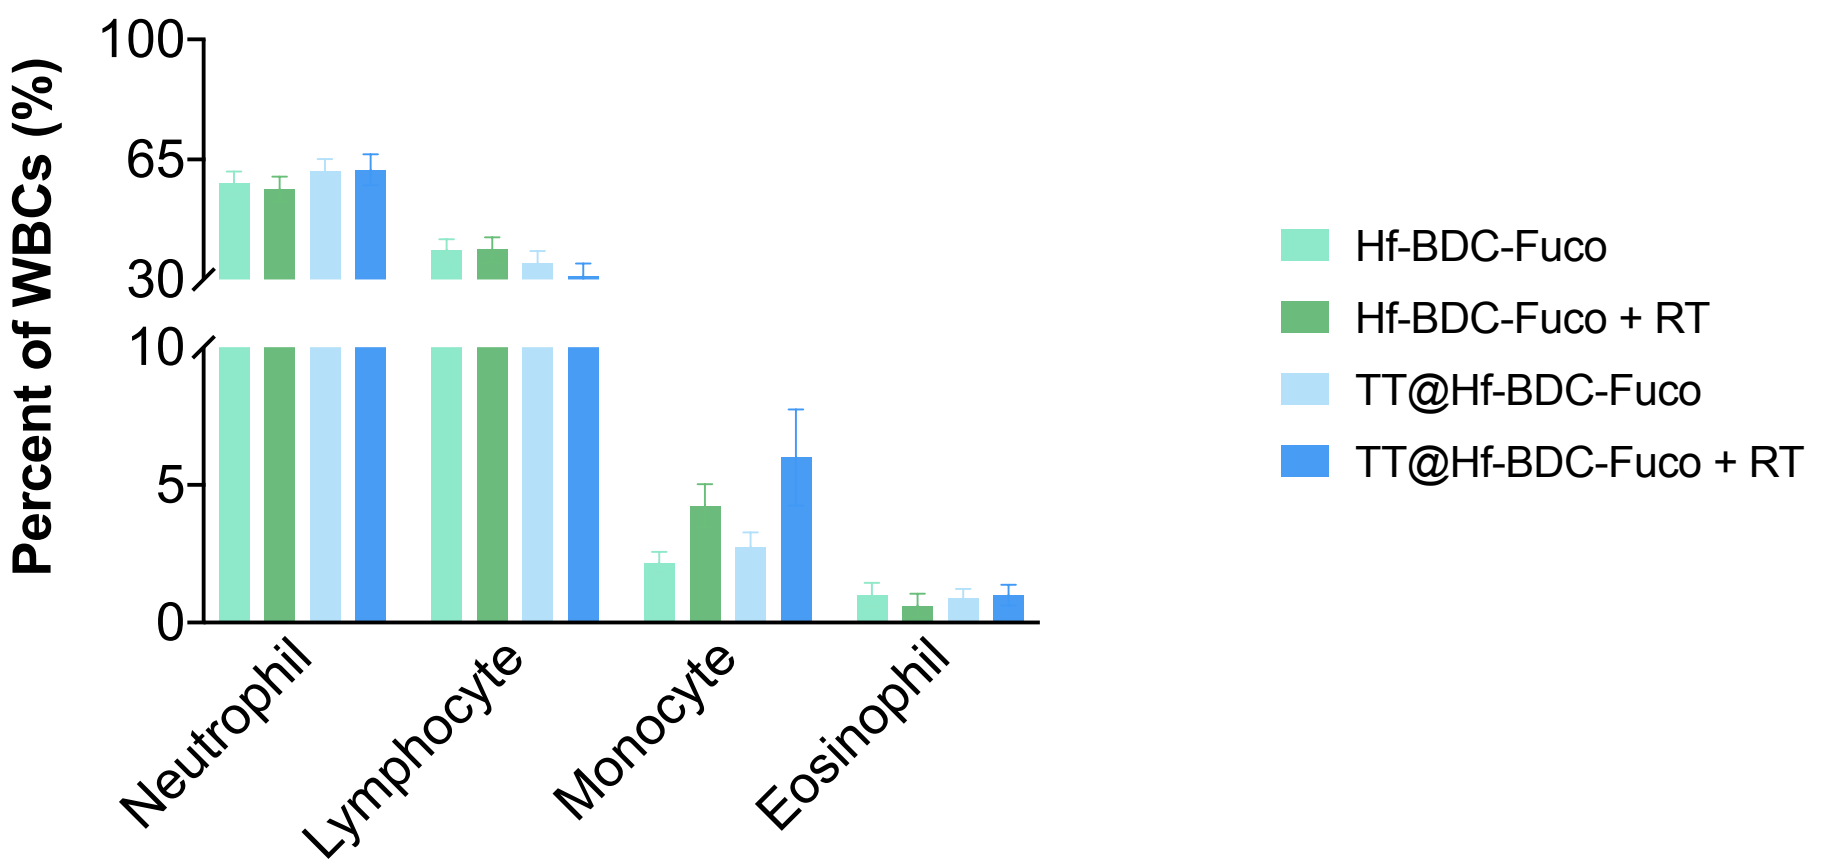

**Supplemental Figure 11. A.** Organ weight averages for mice in each treatment group upon sacrifice. **B.** White blood cell (WBC) evaluation showing the percentage of each type of cell as a portion of total white blood cells.

**Supplemental Table 1**

|                       | <b>IC<sub>50</sub> (μM)</b> | <b>Fold Change IC<sub>50</sub></b> |
|-----------------------|-----------------------------|------------------------------------|
| <b>Tal</b>            | 5.1                         | N/A                                |
| <b>TMZ</b>            | 34.3                        | N/A                                |
| <b>TMZ:Tal (30:1)</b> | 10.7 (0.35 Tal, 10.35 TMZ)  | Tal: -14.6X<br>TMZ:-3.3X           |

**Supplemental Table 1.** IC<sub>50</sub> values calculated for the viability curves in figure 1A along with the change in IC<sub>50</sub> for both drugs when delivered in combination.

**Supplemental Table 2**

|                            | <i>Number Average<br/>(d.nm)</i> | <i>Polydispersity Index<br/>(PDI)</i> | <i>Zeta Potential<br/>(ZP)</i> |
|----------------------------|----------------------------------|---------------------------------------|--------------------------------|
| <i>Hf-BDC</i>              | 84.1 ± 4.0                       | 0.25 ± 0.01                           | 20.4 ± 1.6                     |
| <i>Hf-BDC-Dex</i>          | 90.3 ± 6.5                       | 0.20 ± 0.004                          | -24.5 ± 0.4                    |
| <i>Hf-BDC-Fuco (Gen 1)</i> | 91.0 ± 11.1                      | 0.24 ± 0.03                           | -20.7 ± 2.3                    |
| <i>Hf-BDC-Fuco (Gen 2)</i> | 97.5 ± 6.5                       | 0.17 ± 0.01                           | -28.0 ± 0.6                    |
| <i>TT@Hf-BDC-Fuco</i>      | 100.0 ± 1.2                      | 0.17 ± 0.03                           | -18.0 ± 0.3                    |

**Supplemental Table 2.** Table showing z-average (nm), polydispersity index (PDI), and zeta potential (ZP) values for nanoparticles coated using generation 1 or generation 2 methods.

**Supplemental Table 3**

| <i>Conc. Added (<math>\mu\text{M}</math>)</i> |     | <i>Theoretical Loading (<math>\mu\text{M}</math>)</i> |              | <i>Encapsulation Efficiency (EE%)</i> |             | <i>TMZ: Tal Ratio</i> |     |
|-----------------------------------------------|-----|-------------------------------------------------------|--------------|---------------------------------------|-------------|-----------------------|-----|
| TMZ                                           | Tal | TMZ                                                   | Tal          | TMZ                                   | Tal         | TMZ                   | Tal |
| 500                                           | 500 | $354 \pm 36$                                          | $369 \pm 4$  | $71 \pm 5$                            | $74 \pm 1$  | 1                     | 1   |
| 7000                                          | 400 | $6289 \pm 74$                                         | $216 \pm 39$ | $90 \pm 1$                            | $54 \pm 10$ | 29                    | 1   |

**Supplemental Table 3.** Table demonstrating concentrations added, theoretical loading, encapsulation efficiencies, and final TMZ: Tal ratio for sample gen 1 (row 1) or gen 2 (row 2) nMOFs.
